# Supplementary material for: Poland-Möbius syndrome: a case report implicating a novel mutation of the PLXND1 gene and literature review
Source: Springer Nature journal article supplement (doi:10.1186/s12887-022-03803-3), 2022-12-30
Supplement: MOESM3 [file 23867768]

## Pubmed Search Strategy

|    |                                           |        |
|----|-------------------------------------------|--------|
| 1  | Möbius                                    | 1925   |
| 2  | Moebius                                   | 695    |
| 3  | 1 OR 2                                    | 2420   |
| 4  | Poland                                    | 260687 |
| 5  | Poland's                                  | 823    |
| 6  | 4 OR 5                                    | 260687 |
| 7  | 3 AND 6                                   | 103    |
| 8  | Poland-Möbius                             | 17     |
| 9  | Poland Möbius                             | 79     |
| 10 | Möbius-Poland                             | 2      |
| 11 | Poland-Moebius                            | 10     |
| 12 | Moebius Poland                            | 36     |
| 13 | Poland Moebius                            | 36     |
| 14 | Moebius-Poland                            | 5      |
| 15 | 7 OR 8 OR 9 OR 10 OR 11 OR 12 OR 13 OR 14 | 103    |
| 16 | 15 AND Filters: MEDLINE                   | 71     |

Accessed 16<sup>th</sup> November 2021
